# Supplementary material for: Genetic support of the causal association between gut microbiota and peripheral artery disease: a bidirectional Mendelian randomization study
Source: publisher site journal article supplement (doi:10.18632/aging.205417), 2024-01-09
Supplement: Supplementary file [file aging-v16i1-205417-supplementary-material-SD1.pdf]

## SUPPLEMENTARY FIGURES

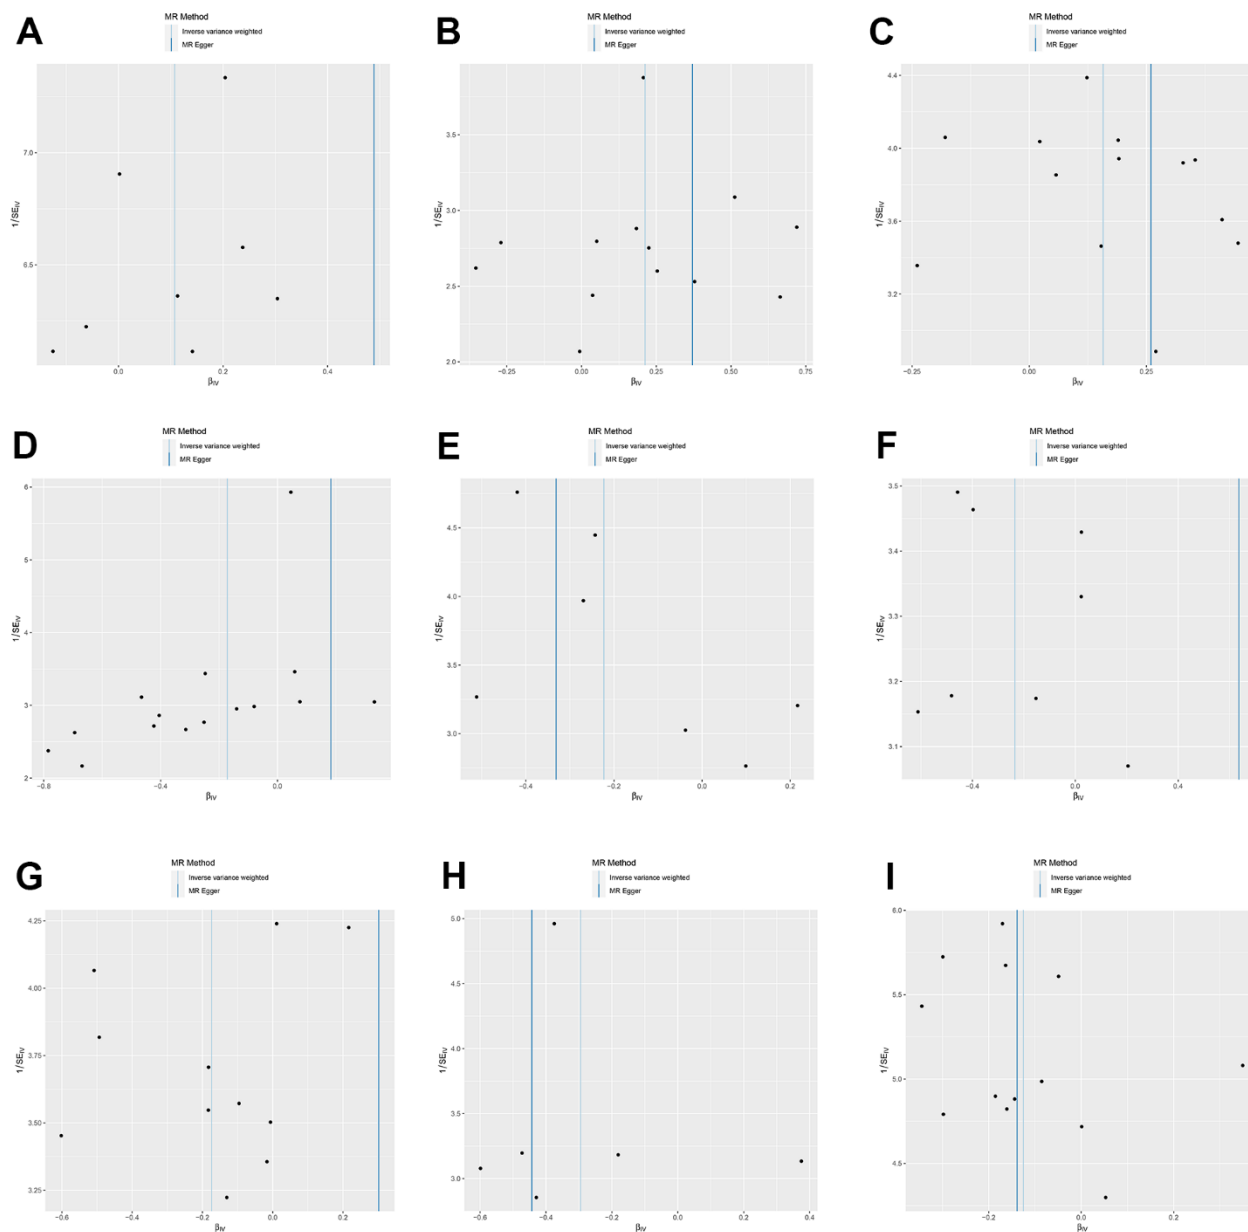

**Supplementary Figure 1. The funnel plots for the association between gut microbiota and PAD. (A) family Family XI; (B) genus *Lachnoclostridium*; (C) genus *Lachnospiraceae* UCG001; (D) class *Actinobacteria*; (E) family *Acidaminococcaceae*; (F) genus *Coprococcus2*; (G) genus *Ruminococcaceae* UCG004; (H) genus *Ruminococcaceae* UCG010; (I) order NB1n.**

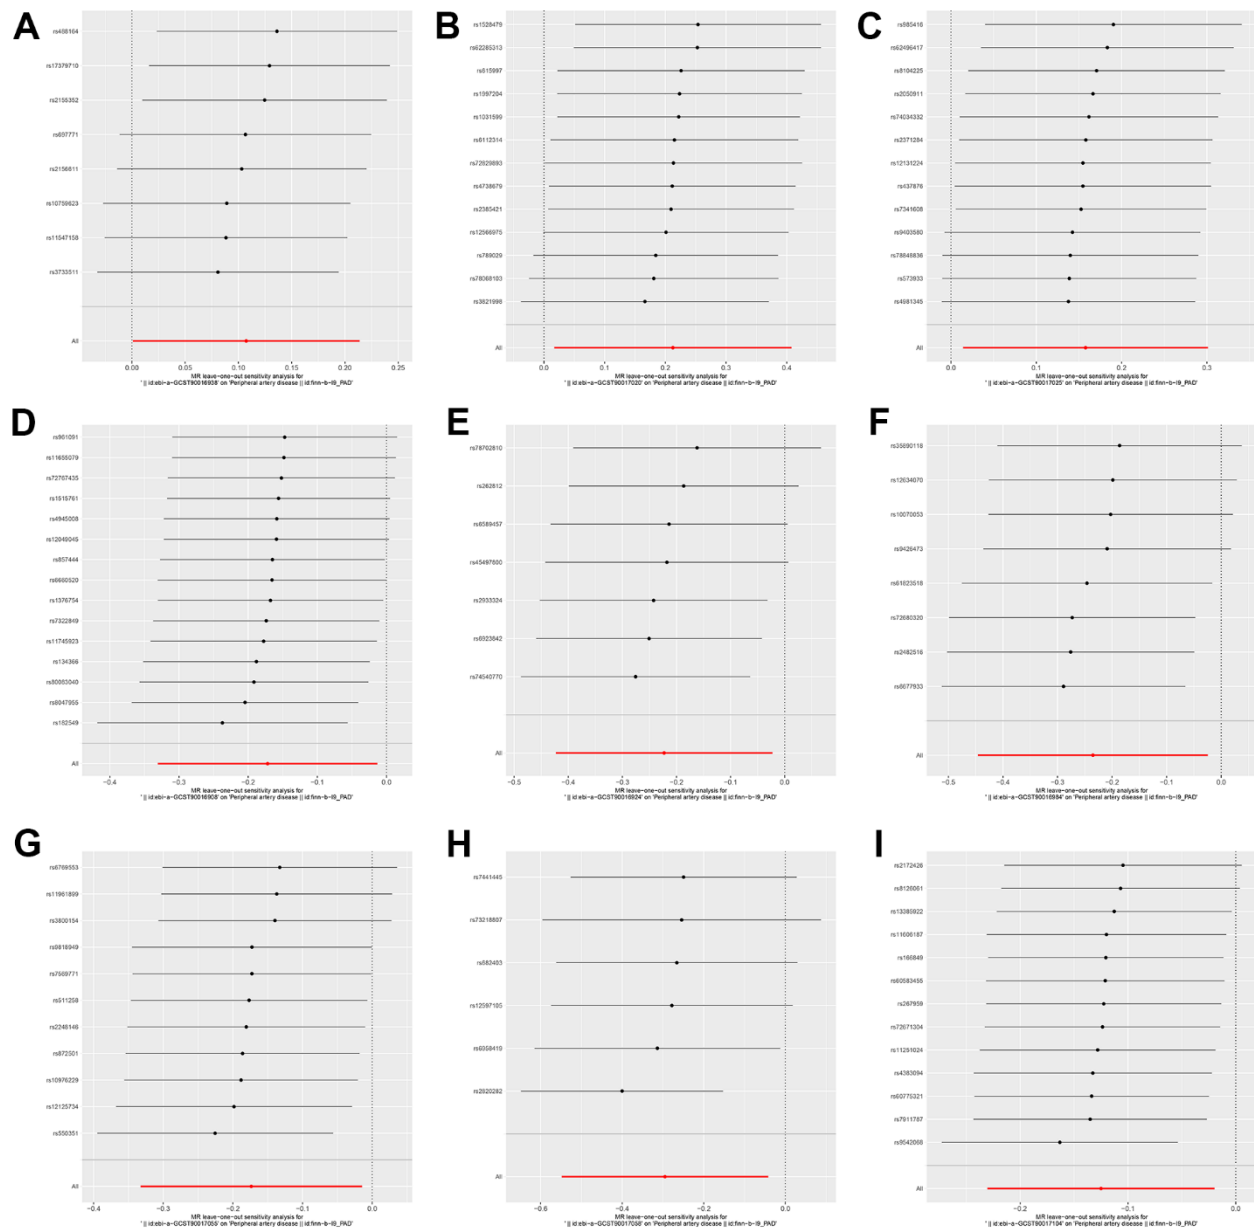

**Supplementary Figure 2. The leave-one-out sensitivity analysis for the association between gut microbiota and PAD. (A) family Family XI; (B) genus *Lachnoclostridium*; (C) genus *Lachnospiraceae* UCG001; (D) class *Actinobacteria*; (E) family *Acidaminococcaceae*; (F) genus *Coprococcus2*; (G) genus *Ruminococcaceae* UCG004; (H) genus *Ruminococcaceae* UCG010; (I) order NB1n.**
